# Supplementary material for: Attachment and antibiotic response of early-stage biofilms studied using resonant hyperspectral imaging
Source: PubMed Central journal article supplement (PMC7695833; doi:10.1038/s41522-020-00169-1), 2020-11-27
Supplement: 41522_2020_169_MOESM1_ESM.pdf [file 41522_2020_169_MOESM1_ESM.pdf]

1        Attachment and antibiotic response of early-stage biofilms  
2                    studied using resonant hyperspectral imaging

3  
4  
5        Yue Wang<sup>1</sup>, Christopher P. Reardon<sup>1</sup>, Nicholas Read<sup>2</sup>, Stephen Thorpe<sup>2</sup>, Adrian Evans<sup>3</sup>,  
6                    Neil Todd<sup>3</sup>, Marjan Van Der Woude<sup>4</sup> and Thomas F. Krauss<sup>1</sup>

7  
8        1. Department of Physics, University of York, Heslington, York, North Yorkshire, YO10 5DD, UK

9        2. Department of Biology, University of York, Heslington, York, North Yorkshire, YO10 5DD, UK

10        3. York Teaching Hospital NHS Foundation Trust, The York Hospital, York, North Yorkshire,  
11                    YO31 8HE, UK

12        4. York Biomedical Research Institute, Hull York Medical School University of York, Heslington,  
13                    York, North Yorkshire, YO10 5DD, UK

14  
15        **Corresponding author:** Dr Yue Wang, Department of Physics, University of York, York  
16        YO10 5DD UK, tel: +44 1904322700, email: yue.wang@york.ac.uk

17        **Supplementary information**

18  
19        I.        Hyperspectral image vs. confocal microscope image

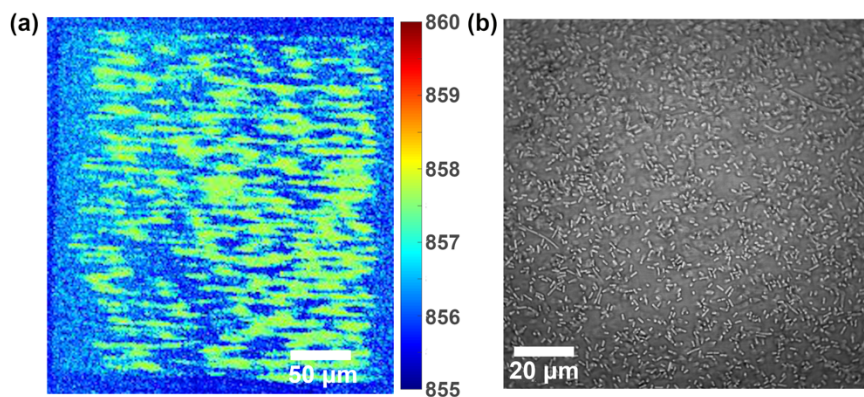

22        **Supplementary Figure 1** (a) Hyperspectral image at 5h from the start of the experiment with  
23        initial e.coli concentration of  $2 \times 10^8$  CFU per mL; (b) a corresponding confocal microscope  
24        image of the same biofilm.

25  
26        II.        Uncertainty in resonance wavelength

27

28 The uncertainty in resonance wavelength,  $\lambda_n$ , is determined by monitoring the grating's  
29 resonance with a constant water flow. Over 7.5 h, the standard deviation ( $\sigma$ ) of the resonance  
30 wavelength is measured to be 0.037 nm. And we estimate the smallest detectable shift to be  
31  $3\sigma$ , which is 0.111 nm. The resonance wavelength shift, which is defined as  $\Delta\lambda = \lambda_n - \lambda_0$ , has  
32 a standard deviation  $\sigma$  of 0.055 nm and  $3\sigma$  of 0.157 nm.

### 33 III. Baclight Live/Dead viability assays

34 Samples are prepared in the flow cell for various lengths of time, i.e. 1 h, 3.5 h, 5 h and 10 h,  
35 with initial *E.coli* TG1 concentration of  $2 \times 10^8$  CFU per mL. The gratings are then taken out  
36 from the flow cell, gently washed three times with phosphate buffered saline (PBS) buffer  
37 three times and stained with the Baclight Live/Dead viability assay. The washing steps are  
38 essential for removing loosely attached non-biofilm cells. The samples are then incubated at  
39 room temperature in the dark for 15 minutes. Fluorescent images are then taken with a ZEISS  
40 LSM 880 single-photon confocal microscope. It is worth noting here that for the short-time-  
41 grown sample (1 h in the flow cell), some bacteria were washed away from the grating  
42 surface during the staining process, due to weak attachment to the surface during this stage -  
43 this image therefore does not reflect the true nature of the sample in this case.

44

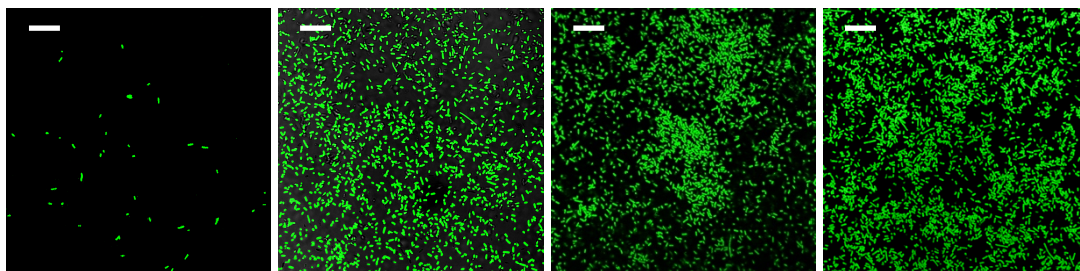

45

46 **Supplementary Figure 2. Confocal microscopic images of early-stage biofilms on the**  
47 **sensor surface.** 1 h, 3.5 h, 5 h and 10 h biofilm samples are stained with the Live/Dead  
48 BacLight viability assay and examined with a ZEISS LSM 800 confocal microscope. The  
49 scale bars in the micrographs are all 10  $\mu\text{m}$  long.

50

### 51 IV. Biofilm formation time

52 The relationship between the bacterial seeding density and the “planktonic” phase time  $t_{plank}$   
53 is plotted in **Supplementary Figure 3**. Although it is intuitive that a lower initial inoculum

54 density leads to a longer biofilm formation time, the technique readily allows us to quantify  
55 this formation time.

56

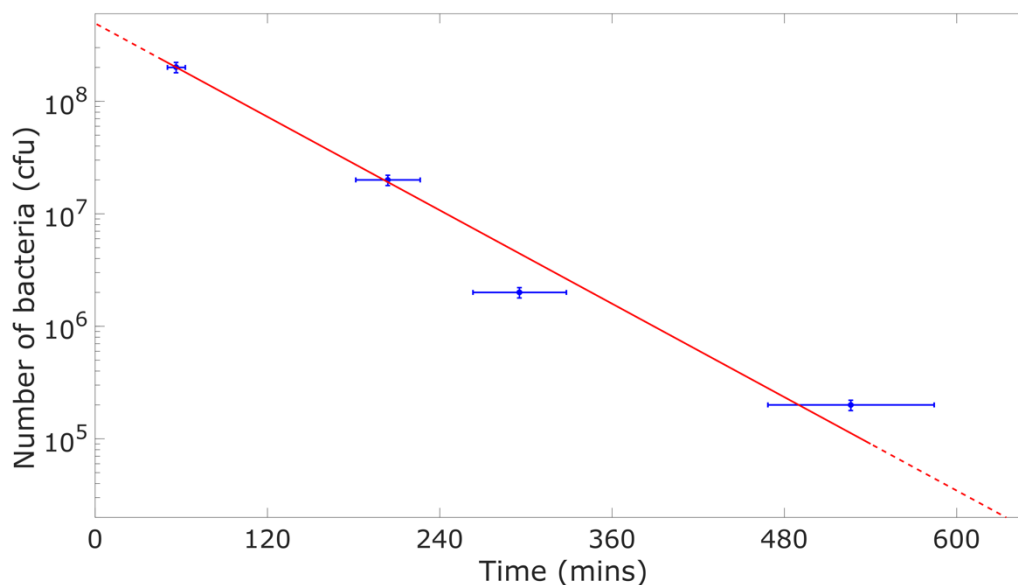

57

58 **Supplementary Figure 3. Estimation of initial bacterial numbers.** Relationship between  
59 the initial bacterial concentration and the “planktonic” phase time duration of the early-stage  
60 biofilm ( $t_{plank}$  in Eq.1) in a log-linear plot. The solid line is a linear fit to the data points. The  
61 error bars represent the standard deviations of repeated experiments.

62

### 63 V. Determining the MICs

64

65 We use a resazurin-based microdilution assay to determine the minimum inhibitory  
66 concentrations (MICs) of different drugs. Trimethoprim, nitrofurantoin, rifampicin and  
67 ciprofloxacin are diluted from individual stock solutions to 1024  $\mu\text{g mL}^{-1}$ . In a 96-well plate,  
68 column 1 of is used as a no antibiotic control and column 12 contains only LB broth as a  
69 sterility control (see Supplementary Figure 4.). For the antibiotic serial dilution, 50  $\mu\text{L}$  of the  
70 1024  $\mu\text{g mL}^{-1}$  antibiotic solution is first added to the 512  $\mu\text{g mL}^{-1}$  column, and is well mixed  
71 with the liquid culture using a multichannel pipette before transferring to the next well, and  
72 repeated twice, to give a range of concentrations between 1 to 512  $\mu\text{g mL}^{-1}$ , see  
73 Supplementary Figure 4.

74

75 *E. coli* TG1 are grown overnight in LB broth at 37°C. Cells are washed three times in Mueller  
76 Hinton broth (MH) then re-suspended in MH before first being diluted to 0.1 OD to give

77 standardised suspension of  $10^8$  CFU per mL. The standardised suspension is diluted 1:100 then  
78 50  $\mu$ L added to each well to give a final bacteria concentration of  $5.5 \times 10^5$  CFU per mL. 50  $\mu$ L  
79 MHB is added to column 12 to give 100  $\mu$ L of solution in all wells. After overnight incubation  
80 at 37°C, 30  $\mu$ L of 0.015% solution of resazurin in MHB is introduced in each well and  
81 incubated for 4 hours. Results are validated by visual inspection of the wells.

82

83 The MIC microdilution experiments have been repeated for four times (twice with resazurin  
84 dye, twice without dye but the growth curves were monitored). The MICs of each drug are 0-  
85  $1 \mu\text{g mL}^{-1}$  (trimethoprim), 4-8  $\mu\text{g mL}^{-1}$  (nitrofurantoin), 8-16  $\mu\text{g mL}^{-1}$  (rifampicin) and 0-1  $\mu\text{g}$   
86  $\text{mL}^{-1}$  (ciprofloxacin). The MIC measurements were all performed with OD = 0.2, i.e.  $2 \times 10^8$   
87 CFU per mL diluted from overnight cultures.

88

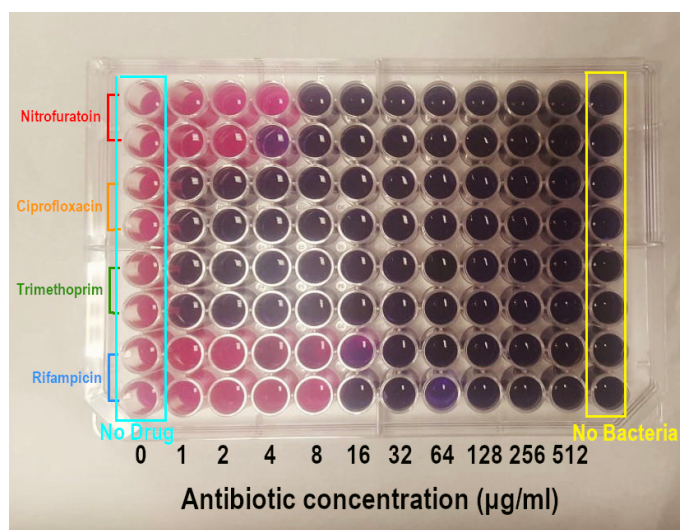

89  
90

91 **Supplementary Figure 4. A resazurin microdilution assay with four different antibiotics.**

92 The concentration of the four antibiotics, nitrofurantoin, ciprofloxacin, trimethoprim and  
93 rifampicin, is increased along the columns from 0 to  $512 \mu\text{g mL}^{-1}$ . Each antibiotic has been  
94 tested in duplicate. The first column has no antibiotic and the last column has only LB broth  
95 with no bacteria. Pink colour indicates growth and dark purple means inhibition of growth.

96

97 VI. Antibiotics susceptibility test

98

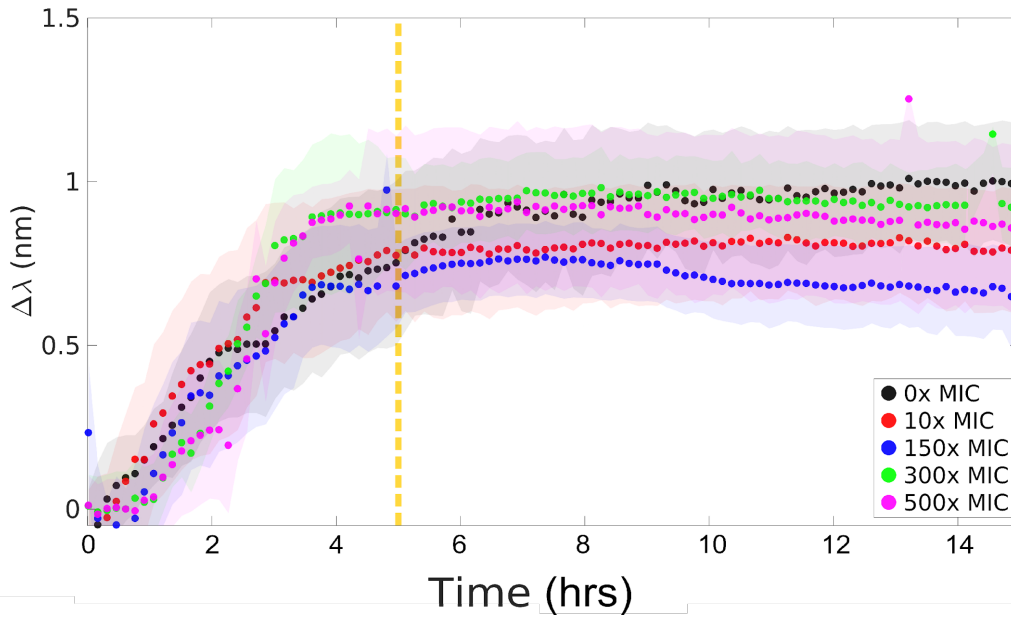

99

100 **Supplementary Figure 5. Trimethoprim susceptibility testing in established biofilms.**

101 Trimethoprim at doses ranging from 10x to 500x MIC is introduced into the culture at 5 h (as  
 102 indicated by the vertical dashed line). We observe no change within experimental accuracy,  
 103 which suggests that trimethoprim has no effect on the biofilm.

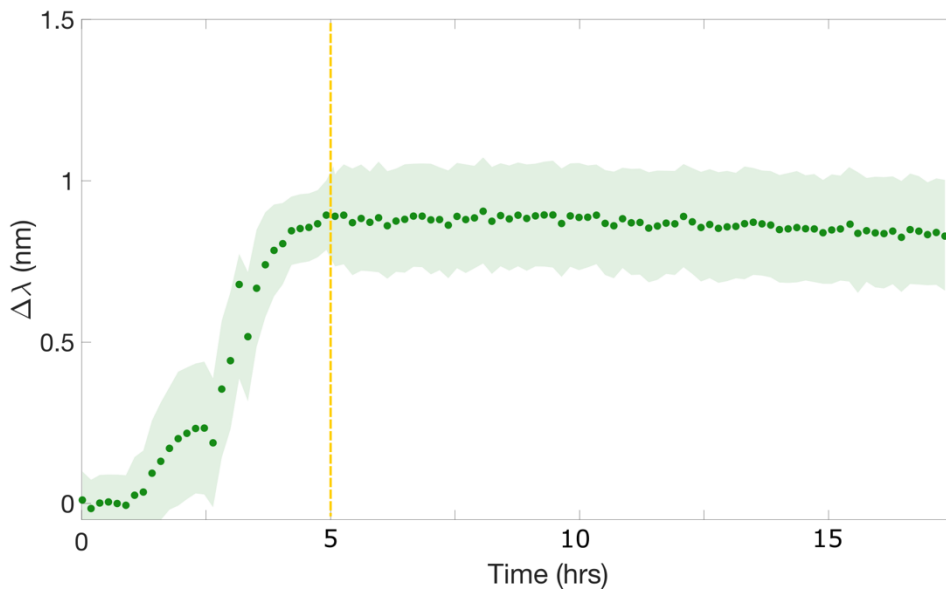

104

105 **Supplementary Figure 6. Nitrofurantoin susceptibility testing in established biofilm.**

106 Nitrofurantoin with a concentration of 500x MIC is introduced into the culture at 5 h, and we  
 107 observe no change in resonance wavelengths in the following 15 hours.

108



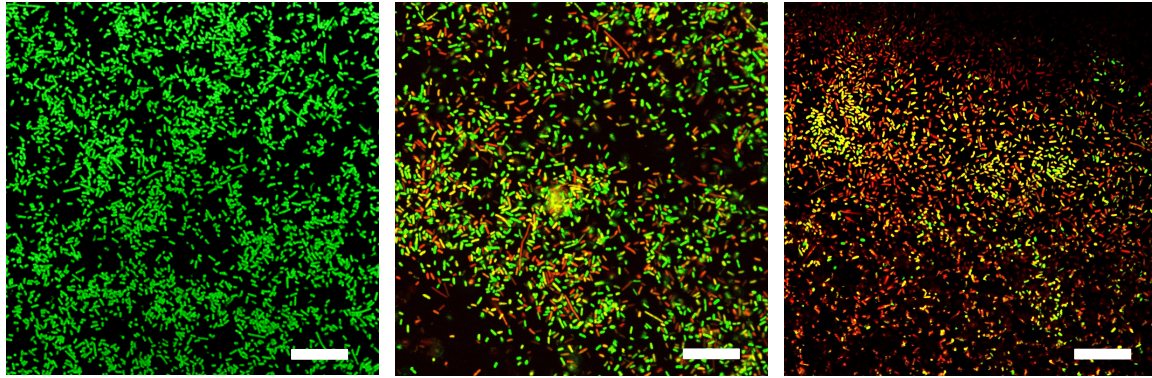

109

110

111

112

113

114

115

**Supplementary Figure 7. Confocal microscopic images of biofilms on the grating surface after 10 h from the start of the experiments.** With no antibiotic injected as a reference (left), with 150x MIC (middle), 500x MIC (right) of trimethoprim injected at 5 h from the start of the experiment. The biofilms were stained with the Live/Dead BacLight viability stain assay at 10 h and cells with compromised membranes stain red, whereas cells with intact membranes stain green. The scale bars in the images are 10  $\mu$ m.

116

## VII. Biofilm formation in bacteria spiked urine

117

118

119

120

121

122

123

124

125

Finally, we verify our technique's capability of working with a more complicated and biological growth culture, i.e. urine. A starting culture of *E.coli* TG1 was made from an overnight culture in LB broth. 50 mL cell suspension was spun down and washed three times in human urine (prefiltered using 0.2  $\mu$ m pore size membrane filters). A suspension with *E.coli* inoculum density of  $2 \times 10^8$  CFU per mL, was flown through the sensor with the resonance wavelength shift monitored, see Supplementary Figure 8. Interestingly, the sensor detected full biofilm coverage within 60 minutes, i.e. significantly faster than in LB. This demonstrates that our sensor is capable of operating with a relevant biological matrix.

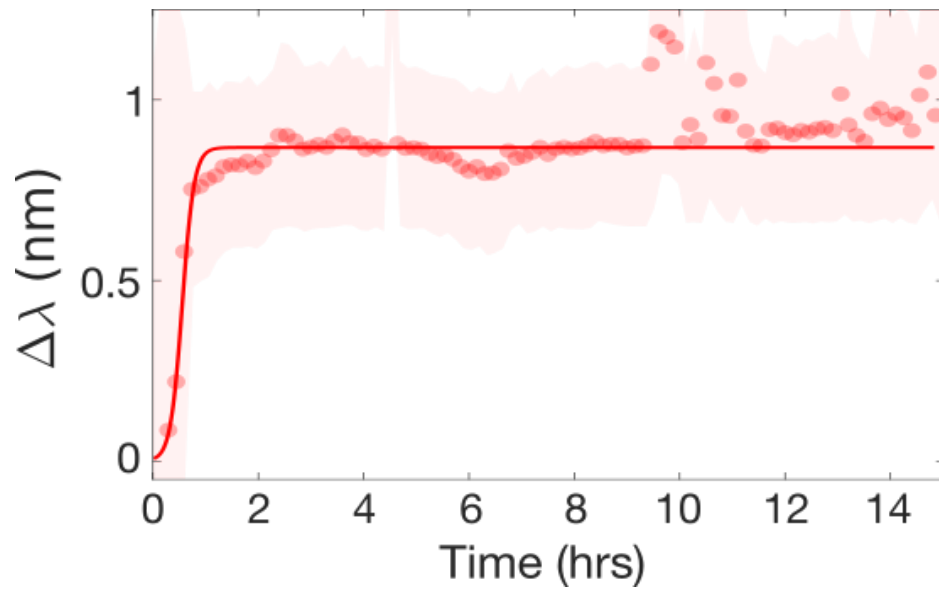

126

127 **Supplementary Figure 8. Biofilm detection in bacterial spiked human urine.** Biofilm  
128 growth is detected by the sensor in the flow cell with a suspension with *E.coli* inoculum  
129 concentration of  $2 \times 10^8$  CFU per mL in human urine.

130

131

132
